# Supplementary material for: Growth-Climate Relationships and Long-Term Growth Trends of the Tropical Forest Tree Choerospondias axillaris (Anacardiaceae) in East-Central Thailand
Source: MDPI journal article supplement (doi:10.3390/f12121655), 2021-11-29
Supplement: s1 [file s1]

Archive with 1 entries (1 files):
- forests-1435850-supplementary.pdf
